# Supplementary material for: Synthesis and characterization of rare-earth-free magnetic manganese bismuth nanocrystals
Source: Royal Society of Chemistry journal article supplement (doi:10.1039/c4ra12440e), 2014-12-15
Supplement: c4ra12440e1.pdf [file c4ra12440e1.pdf]

## **Supporting Information**

### **Synthesis and Characterization of Rare-Earth-Free Magnetic Manganese Bismuth Nanocrystals**

Jian Shen,<sup>a,†</sup> Huizhong Cui,<sup>a,†</sup> Xiaopeng Huang,<sup>a</sup> Maogang Gong,<sup>a</sup> Wei Qin,<sup>a</sup> Alec Kirkemide,<sup>a</sup> Jun Cui,<sup>b</sup> and Shenqiang Ren<sup>a,\*</sup>

<sup>a</sup> Department of Chemistry, University of Kansas, Lawrence, Kansas, 66045, USA.

<sup>b</sup> Pacific Northwest National Laboratory, Richland, WA 99352, USA

\* E-mails: shenqiang@ku.edu (S.Q. Ren)

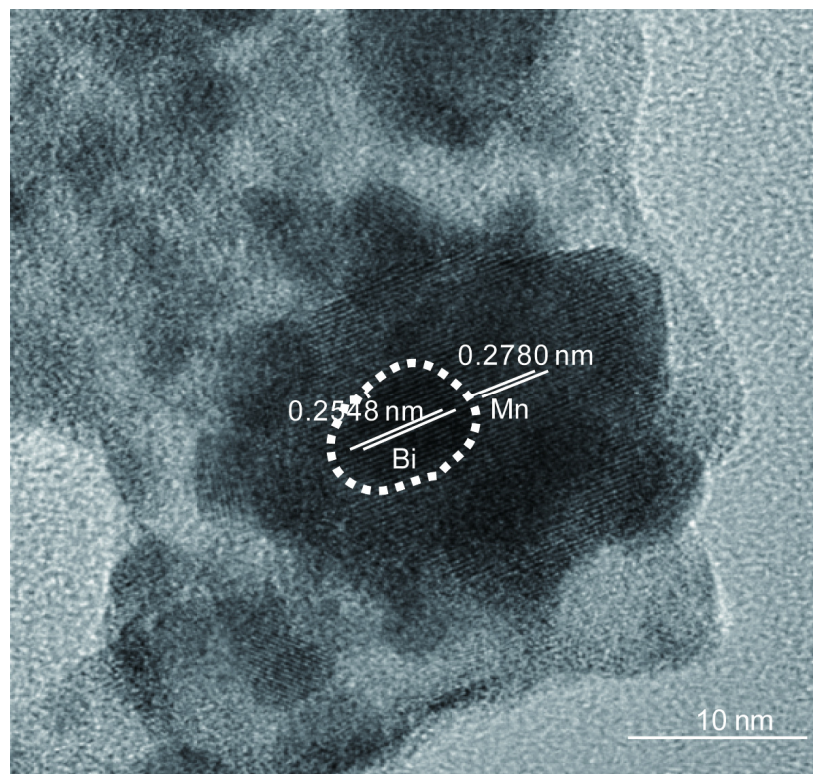

**Figure S1** The lattice structure of both Mn and Bi phase of core-shell MnBi ink after 24 hours reaction

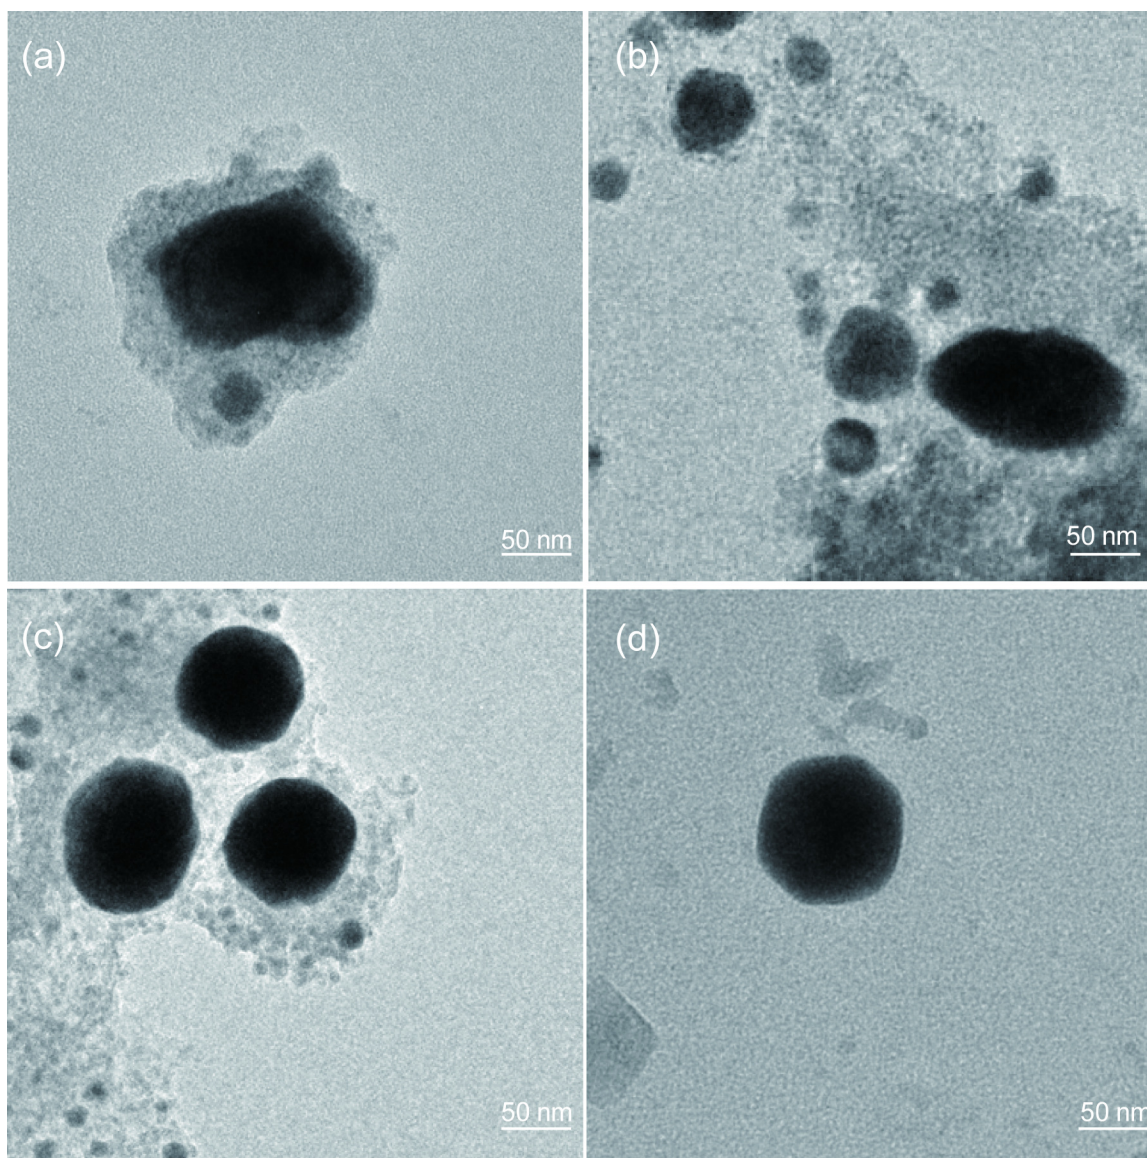

**Figure S2.** TEM image showing the MnBi core-shell ink with comparative parameters. (a)  $\text{Mn}_2(\text{CO})_{10}$ ,  $200^\circ\text{C}$ , (b)  $\text{Mn}_2(\text{CO})_{10}$ ,  $260^\circ\text{C}$ , (c) Octadecene,  $310^\circ\text{C}$ , (d) Benzyl ether,  $200^\circ\text{C}$ .



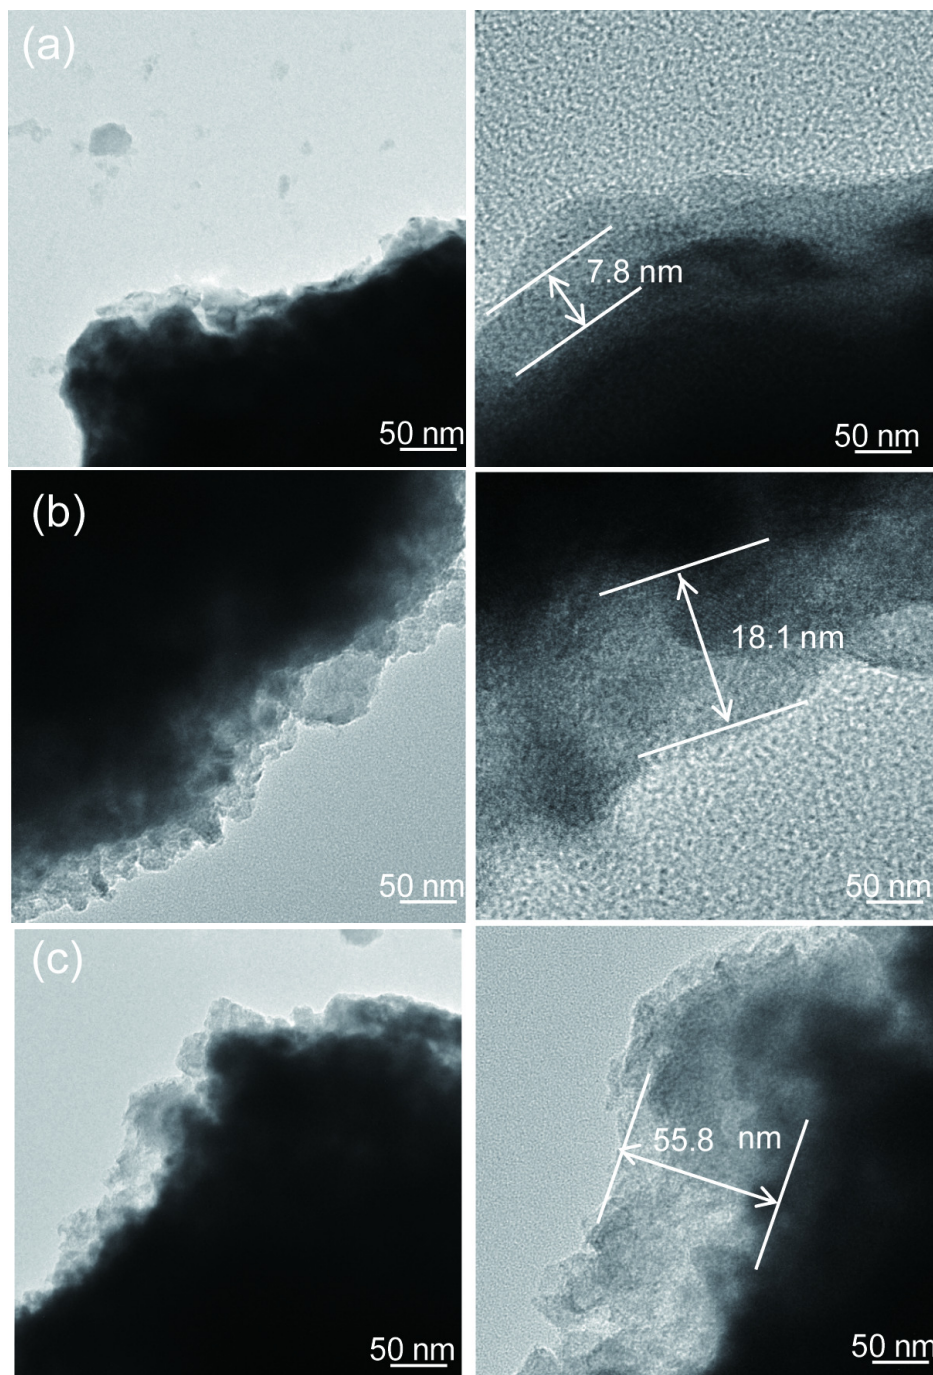

**Figure S3.** Thickness control of Co shell on MnBi alloy nanocrystals by controlling the reaction temperature for MnBi and  $\text{Co}_2(\text{CO})_8$  mixture at (a) 50°C, (b) 100°C, (c) 200°C for low and high resolution TEM images (left and right, respectively).

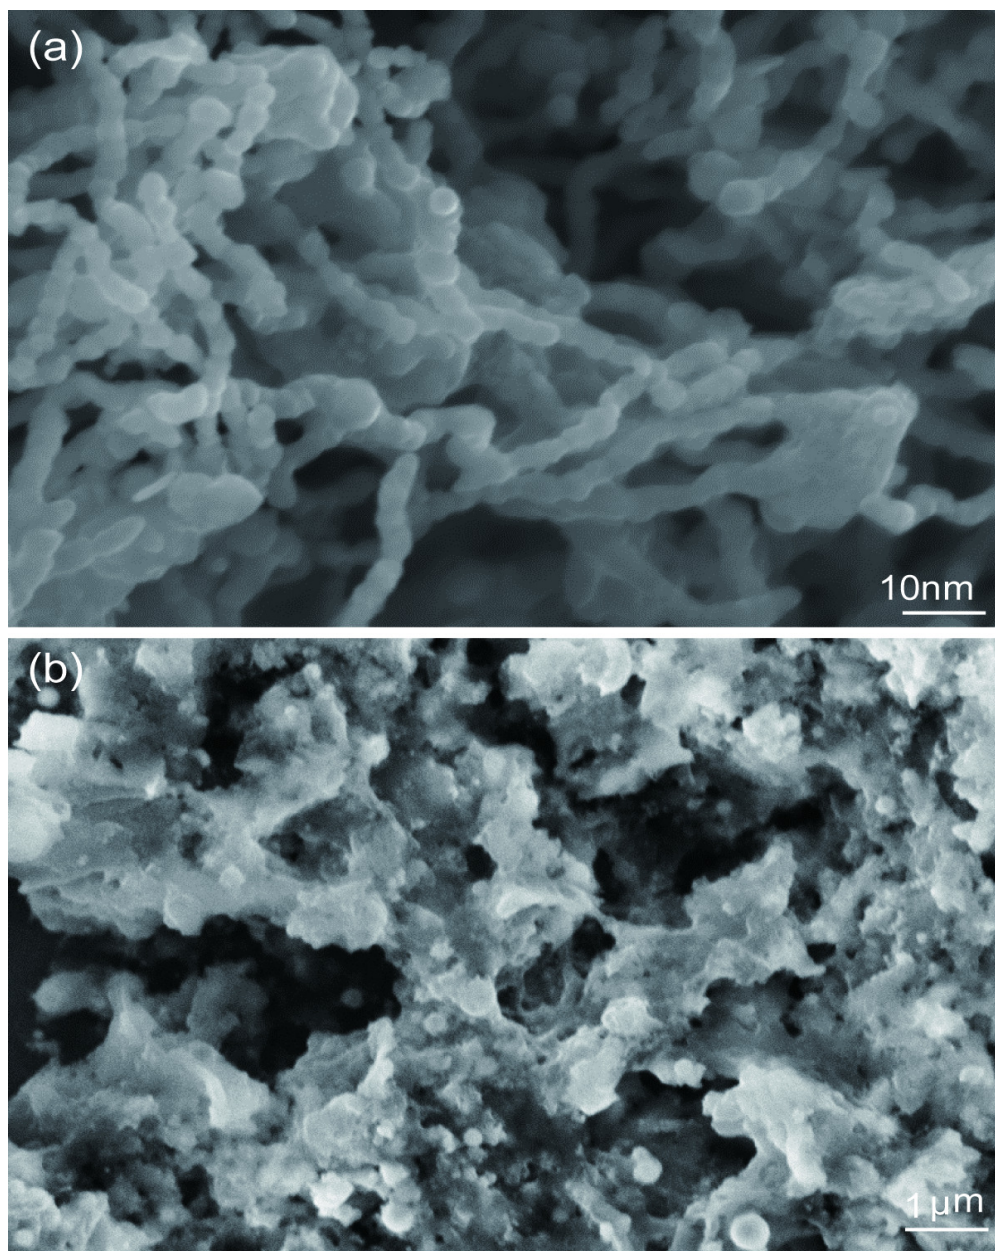

**Figure S4.** SEM image of (a) cobalt nanowires and (b) MnBi alloy.

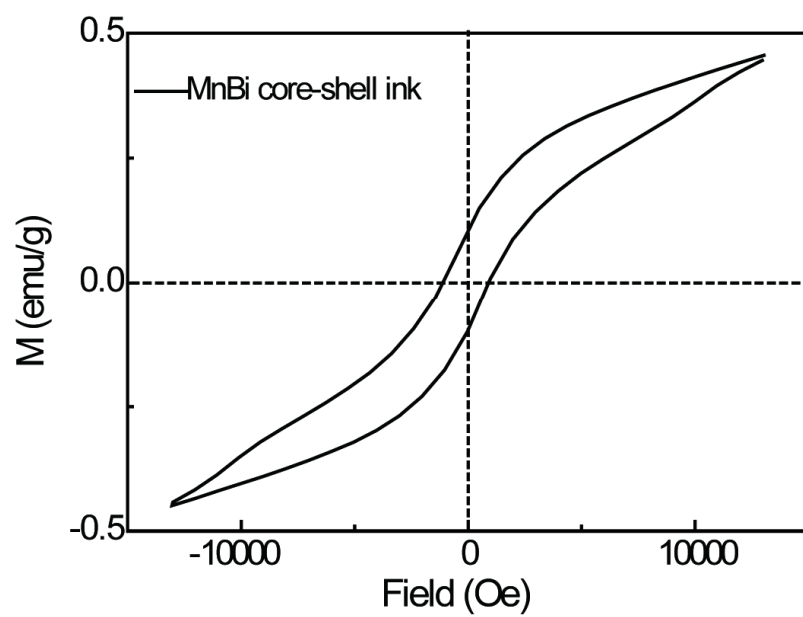

**Figure S5.** Magnetic hysteresis loop of the MnBi core-shell ink.

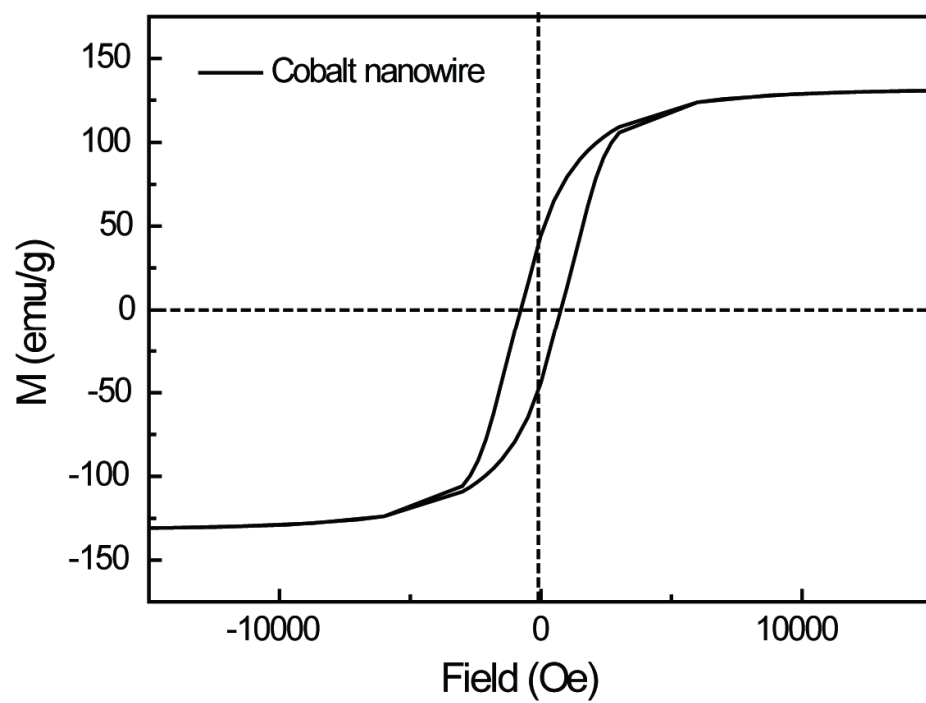

**Figure S6.** Magnetic hysteresis loop of cobalt nanowires.
